# Supplementary material for: A rare case of type II negative pressure pulmonary edema following extraction of inhaled peanuts in a 21-month-old boy
Source: PubMed Central journal article supplement — J Int Med Res. 2021 Sep 29;49(9):03000605211047779. doi: 10.1177/03000605211047779 (PMC8485296; doi:10.1177/03000605211047779), 2021-09-29
Supplement: sj-pdf-2-imr-10.1177_03000605211047779.pdf [file sj-pdf-2-imr-10.1177_03000605211047779.pdf]

## SAGE AUTHORSHIP CHANGE REQUEST

### INSTRUCTIONS:

Please complete all sections of this form. We require that **all** authors (including current co-authors, those to be added and those to be removed) sign the relevant sections below. We require all signatures on the same copy of the form. Once complete, please email the form back to the sender.

### SECTION ONE: PAPER INFORMATION

|              |                  |                      |
|--------------|------------------|----------------------|
| JOURNAL NAME | J of Int Med Res |                      |
| PAPER TITLE  |                  | MANUSCRIPT ID NUMBER |
|              |                  | JIMR-21-1013.R1      |

### SECTION TWO: ESSENTIAL CONDITIONS FOR CHANGE

The new author list should contain only those who can legitimately claim authorship. This is all those who:

- 1) Have made a substantial contribution to the concept or design of the article; or the acquisition, analysis, or interpretation of data for the study; AND
- 2) Drafted the article or revised it critically for important intellectual content; AND
- 3) Approved the version to be published; AND
- 4) Agreed to be accountable for all aspects of the work in ensuring that questions related to the accuracy or integrity of any part of the work are appropriately investigated and resolved.

All registered authors should meet the conditions of all of the points above. All contributors who do not meet the criteria for authorship should instead be listed in an 'Acknowledgements' section.

### SECTION THREE: REASON FOR AUTHORSHIP CHANGE

Please provide a detailed explanation for the change in authors in the box below.

Drs Dong and Wang are members of my team and participated in the care of the patient. Based on this, they were included as coauthors. But later I found their involvement in the patient care without other contributions does not meet authorship requirement, so they were removed as coauthors from the manuscript. My apologies for the oversight. We have acknowledged Drs Dong and Wang for the care of the patient in the revised manuscript.
